# Supplementary material for: Impact of age on the toxicity of immune checkpoint inhibition
Source: PubMed Central journal article supplement (PMC7545628; doi:10.1136/jitc-2020-000871), 2020-10-08
Supplement: jitc-2020-000871supp001.pdf [file jitc-2020-000871supp001.pdf]

## Supplementary Table

Table S1: Treatment modalities used for ≥G3 toxicities

| Overall Toxicities ≥G3         | Overall        | <65 yrs           | 65-74 yrs        | ≥75 yrs        | Chi Squared |
|--------------------------------|----------------|-------------------|------------------|----------------|-------------|
| <b>Total episodes</b>          | <b>72</b>      | <b>31</b>         | <b>27</b>        | <b>14</b>      |             |
| <b>Treatment</b>               |                |                   |                  |                |             |
| Non-steroid immunosuppressant  | 4 (5.6%)       | 2 (6.5%)          | 1 (3.7%)         | 1 (7.1%)       | NA          |
| IV Steroid                     | 23 (31.9%)     | 16 (51.6%)        | 6 (22.2%)        | 1 (7.1%)       |             |
| Oral Steroid                   | 32 (44.4%)     | 7 (22.6%)         | 15 (55.6%)       | 10 (71.4%)     |             |
| Non- immunosuppressant only    | 11 (15.3%)     | 4 (12.9%)         | 5 (18.5%)        | 2 (14.3%)      |             |
| No treatment                   | 2 (2.8%)       | 2 (6.5%)          | 0 (0.0%)         | 0 (0.0%)       |             |
| <b>Dermatitis</b>              | <b>Overall</b> | <b>&lt;65 yrs</b> | <b>65-74 yrs</b> | <b>≥75 yrs</b> |             |
| <b>Total episodes</b>          | <b>3</b>       | <b>0</b>          | <b>2</b>         | <b>1</b>       |             |
| <b>Treatment</b>               |                |                   |                  |                |             |
| IV Steroid                     | 1 (33.3%)      | 0 (0.0%)          | 1 (50.0%)        | 0 (0.0%)       | NA          |
| Oral Steroids+ Topical steroid | 2 (66.7%)      | 0 (0.0%)          | 1 (50.0%)        | 1 (100.0%)     |             |
| <b>Lower GI</b>                | <b>Overall</b> | <b>&lt;65 yrs</b> | <b>65-74 yrs</b> | <b>≥75 yrs</b> |             |
| <b>Total episodes</b>          | <b>24</b>      | <b>13</b>         | <b>6</b>         | <b>5</b>       |             |
| <b>Treatment</b>               |                |                   |                  |                |             |
| Non-steroid immunosuppressant  | 2 (8.3%)       | 1 (7.7%)          | 1 (16.7%)        | 0 (0.0%)       | NA          |
| IV Steroid                     | 13 (54.2%)     | 11 (84.6%)        | 2 (33.3%)        | 0 (0.0%)       |             |
| Oral Steroid                   | 9 (37.5%)      | 1 (7.7%)          | 3 (50.0%)        | 5 (100.0%)     |             |
| <b>Endocrine</b>               | <b>Overall</b> | <b>&lt;65 yrs</b> | <b>65-74 yrs</b> | <b>≥75 yrs</b> |             |
| <b>Total episodes</b>          | <b>11</b>      | <b>4</b>          | <b>5</b>         | <b>2</b>       |             |
| <b>Treatment</b>               |                |                   |                  |                |             |
| Oral Steroid                   | 5 (45.5%)      | 2 (50.0%)         | 2 (40.0%)        | 1 (50.0%)      | NA          |
| Non- immunosuppressant only    | 6 (54.5%)      | 2 (50.0%)         | 3 (60.0%)        | 1 (50.0%)      |             |
| <b>Hepatitis</b>               | <b>Overall</b> | <b>&lt;65 yrs</b> | <b>65-74 yrs</b> | <b>≥75 yrs</b> |             |
| <b>Total episodes</b>          | <b>13</b>      | <b>4</b>          | <b>5</b>         | <b>4</b>       |             |
| <b>Treatment</b>               |                |                   |                  |                |             |
| Non-steroid immunosuppressant  | 2 (15.4%)      | 1 (25.0%)         | 0 (0.0%)         | 1 (25.0%)      | NA          |
| IV Steroid                     | 4 (30.8%)      | 1 (25.0%)         | 2 (40.0%)        | 1 (25.0%)      |             |
| Oral Steroid                   | 7 (53.8%)      | 2 (50.0%)         | 3 (60.0%)        | 2 (50.0%)      |             |
| <b>Rheumatological</b>         | <b>Overall</b> | <b>&lt;65 yrs</b> | <b>65-74 yrs</b> | <b>≥75 yrs</b> |             |
| <b>Total episodes</b>          | <b>4</b>       | <b>2</b>          | <b>2</b>         | <b>0</b>       |             |
| <b>Treatment</b>               |                |                   |                  |                |             |
| IV Steroid                     | 1 (25.0%)      | 1 (50.0%)         | 0 (0.0%)         | 0 (0.0%)       | NA          |
| Oral Steroid                   | 3 (75.0%)      | 1 (50.0%)         | 2 (100.0%)       | 0 (0.0%)       |             |
| <b>Other Toxicities</b>        | <b>Overall</b> | <b>&lt;65 yrs</b> | <b>65-74 yrs</b> | <b>≥75 yrs</b> |             |
| <b>Total episodes</b>          | <b>17</b>      | <b>8</b>          | <b>7</b>         | <b>2</b>       |             |
| <b>Treatment</b>               |                |                   |                  |                |             |
| IV Steroid                     | 4 (23.5%)      | 3 (37.5%)         | 1 (14.3%)        | 0 (0.0%)       | NA          |
| Oral Steroid                   | 6 (35.3%)      | 1 (12.5%)         | 4 (57.1%)        | 1 (50.0%)      |             |
| Other treatment only           | 5 (29.4%)      | 2 (25.0%)         | 2 (28.6%)        | 1 (50.0%)      |             |
| No Treatment                   | 2 (11.8%)      | 2 (25.0%)         | 0 (0.0%)         | 0 (0.0%)       |             |

NA – not enough data for meaningful analysis
